# Supplementary material
Source: ML conference proceedings conference paper supplement (https://openaccess.thecvf.com/content/CVPR2022/html/Chan_Efficient_Geometry-Aware_3D_CVPR_2022_paper.html)
Supplement: Supplementary file 3 [file Chan_Efficient_Geometry-Aware_3D_CVPR_2022_supplemental.zip]

Archive with 6 entries (5 files):
- 03308-supp/
- 03308-supp/.DS_Store
- __MACOSX/03308-supp/._.DS_Store
- 03308-supp/03308-vid.mp4
- 03308-supp/03308-supp.pdf
- __MACOSX/03308-supp/._03308-supp.pdf
